# Supplementary material for: A new method to cross-link a polyplex for enhancing in vivo stability and transfection efficiency
Source: Royal Society of Chemistry journal article supplement (doi:10.1039/c3bm60204d), 2013-11-28
Supplement: c3bm60204d.pdf [file c3bm60204d.pdf]

1. The variation of transmittance for poly(amido amine) without disulfide bond with temperature.

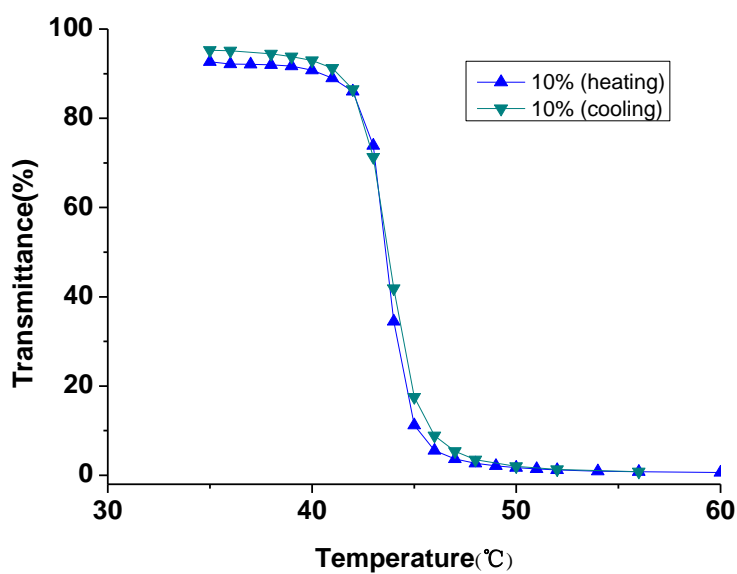

Figure S1

2.  $^1\text{H}$  NMR and  $^{13}\text{C}$  NMR spectra of disulfide-contained poly(amido amine)

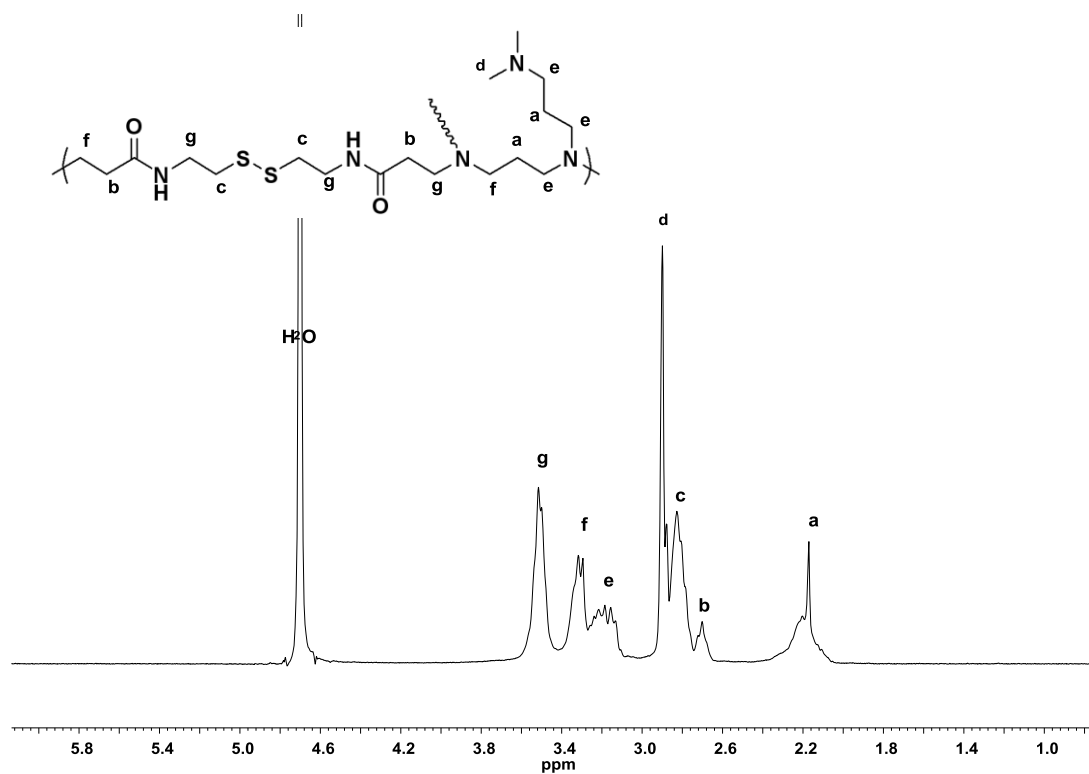

Figure S2

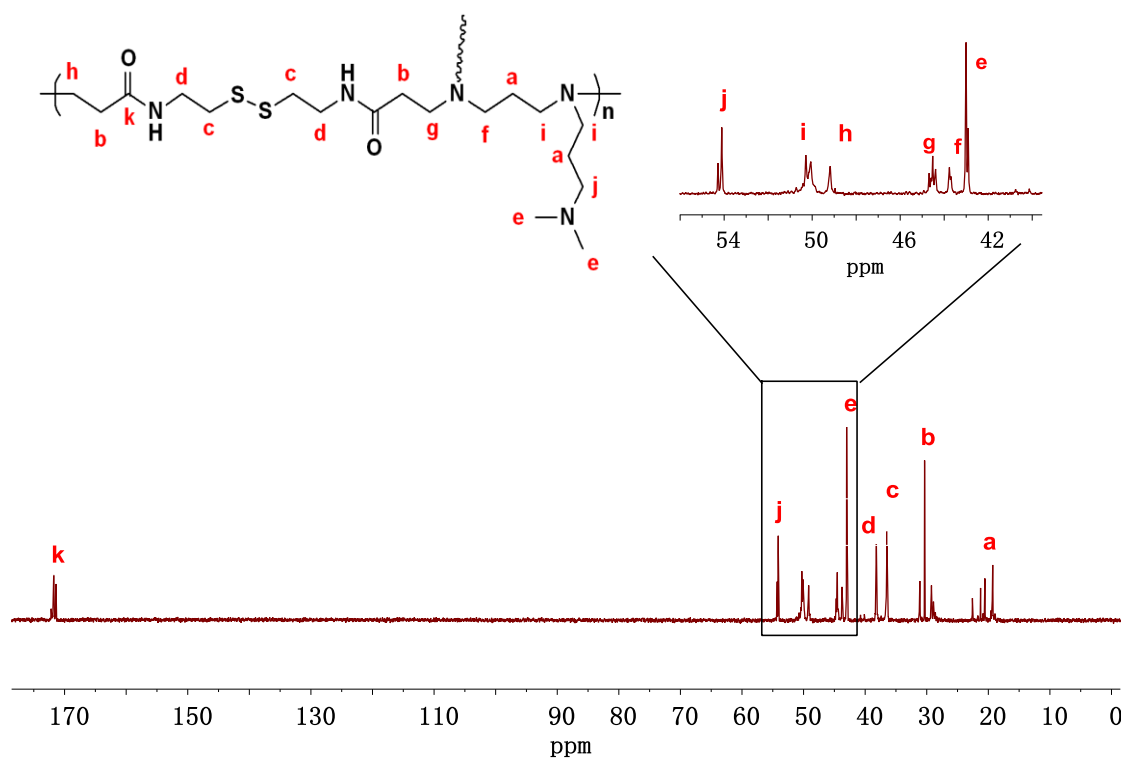

Figure S3

3. The size change of non-disulfide-contained hyperbranched poly(amido amine) polyplex with the time of heating.

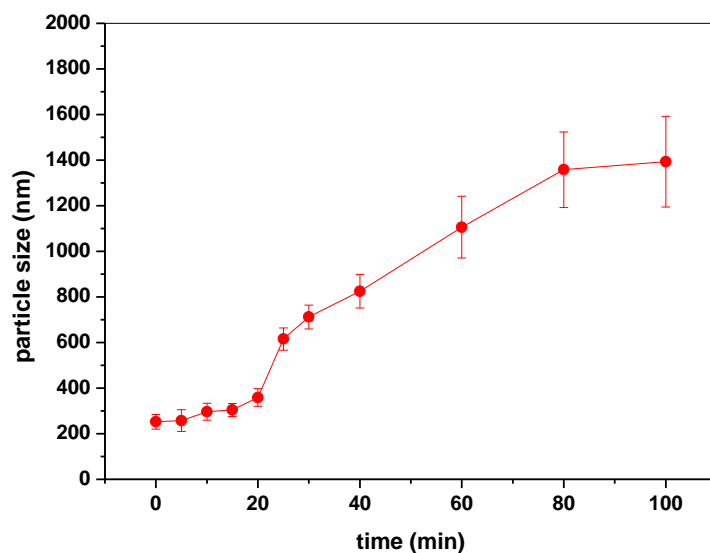

Figure S4

4. Transfection activity of polyplexes of non-reducible control (control hyperbranched poly(amido amine) without disulfides) in COS-7 cells at different cross-linking time with 10% serum

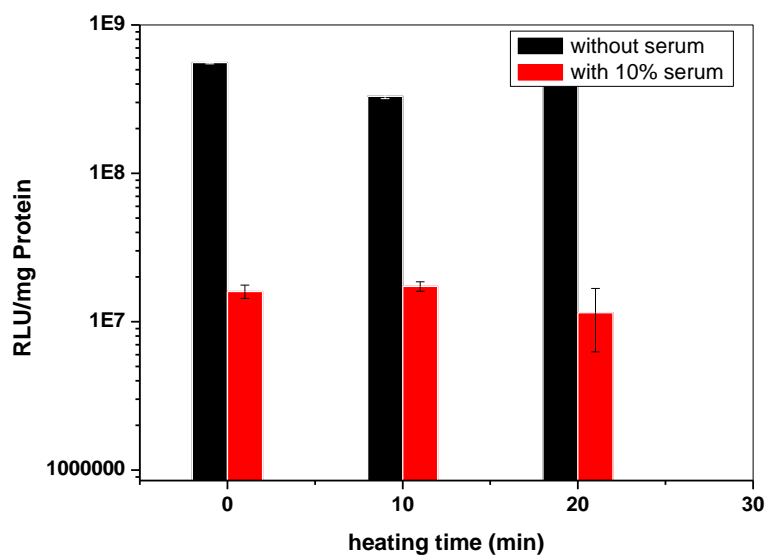

Figure S5

5. Transfection efficiency of both cross-linked and non-cross-linked polyplexes at the N/P ratio of 20, 30 and 40 in CHO cells with 50% serum.

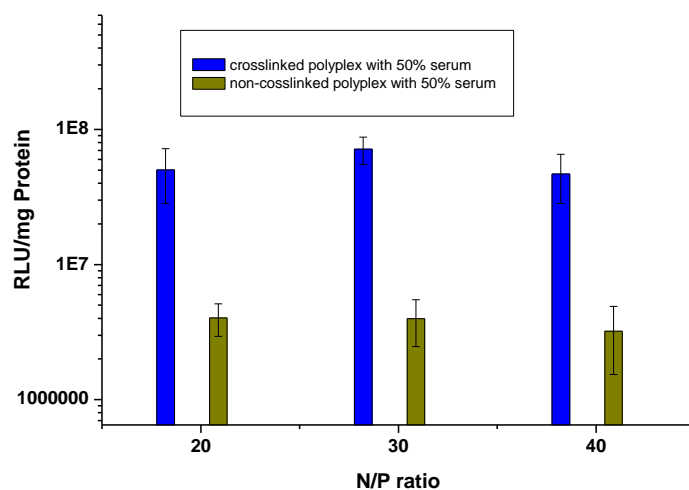

Figure S6
